# Supplementary material for: Photophysics of a Schiff base: theoretical exploration of the excited-state deactivation mechanisms of N-salicilydenemethylfurylamine (SMFA)
Source: Royal Society of Chemistry journal article supplement (doi:10.1039/c3cp54416h), 2013-11-11
Supplement: c3cp54416h.pdf [file c3cp54416h.pdf]

## Photophysics of Schiff Base: A Theoretical exploration of the excited-state deactivation mechanisms of N-salicylidene-methylfurylamine (SMFA)

Ahmad J. Moghadam, Reza Omidyan<sup>□</sup> and Valiollah Mirkhani

*Department of Chemistry, University of Isfahan, 81746-73441 Isfahan, Iran.*

### Electronic Supplementary Information:

This supplementary material section contains 4 Tables:

**Table SM1:** The ground state xyz coordinates of the optimized geometry of the SMFA at the MP2/cc-pVDZ and CC2/ cc-pVDZ level.

**Table SM2:** The ground state xyz coordinates and the optimized geometry of 16 rotamers of the ground isomers of SMFA.

**Table SM3:** The charge distributions in the ground and the first excited states of the SMFA.

**Table SM4:** Selected Bonds lengths (Å), Bond angles, and dihedral angles (deg) of the S<sub>0</sub> and S<sub>1</sub> geometry optimized of SMFA (Enol and Cis-keto Forms).

| Enol form of the SMFA (5a, 0.00 eV) |          |          |          |  |
|-------------------------------------|----------|----------|----------|--|
| S0 (Mp2 optimized)                  |          |          |          |  |
| N                                   | -0.31691 | 1.36366  | -0.05114 |  |
| C                                   | 3.84087  | 0.33357  | 0.05321  |  |
| C                                   | 4.17536  | -1.02519 | 0.01372  |  |
| C                                   | 2.49178  | 0.74410  | 0.02318  |  |
| C                                   | 1.47179  | -0.24852 | -0.04721 |  |
| C                                   | 3.17054  | -2.01173 | -0.05634 |  |
| C                                   | 1.83015  | -1.61623 | -0.08632 |  |
| O                                   | 2.21628  | 2.06208  | 0.06262  |  |
| C                                   | 0.05607  | 0.12160  | -0.08261 |  |
| H                                   | -0.67396 | -0.70757 | -0.13997 |  |
| H                                   | 1.22187  | 2.12208  | 0.03295  |  |
| H                                   | 4.61192  | 1.10828  | 0.10788  |  |
| H                                   | 5.23034  | -1.31880 | 0.03805  |  |
| H                                   | 3.43587  | -3.07266 | -0.08698 |  |
| H                                   | 1.03098  | -2.36533 | -0.14050 |  |
| C                                   | -1.75444 | 1.68685  | -0.09389 |  |
| C                                   | -2.69568 | 0.53232  | -0.12958 |  |
| C                                   | -3.34826 | -0.12846 | -1.15375 |  |
| C                                   | -4.04586 | -1.22586 | -0.54930 |  |
| C                                   | -3.75941 | -1.15585 | 0.79766  |  |
| O                                   | -2.94179 | -0.09751 | 1.06293  |  |
| H                                   | -3.32556 | 0.15069  | -2.20708 |  |
| H                                   | -4.67882 | -1.96728 | -1.03535 |  |
| H                                   | -4.05811 | -1.75211 | 1.65736  |  |
| H                                   | -1.92224 | 2.31536  | -0.98523 |  |
| H                                   | -1.96637 | 2.31728  | 0.78689  |  |
| S1 (CC2 optimized)                  |          |          |          |  |
| N                                   | 1.20346  | -3.41089 | 0.44065  |  |
| C                                   | -0.90567 | 0.13697  | -0.77087 |  |
| C                                   | -0.83881 | 0.54873  | -2.14764 |  |
| C                                   | -0.13830 | -0.92446 | -0.34127 |  |
| C                                   | 0.69909  | -1.66928 | -1.24237 |  |
| C                                   | -0.04437 | -0.15030 | -3.04287 |  |
| C                                   | 0.71009  | -1.27079 | -2.59345 |  |
| O                                   | -0.15578 | -1.28220 | 1.03099  |  |
| C                                   | 1.50852  | -2.74611 | -0.73817 |  |
| H                                   | 2.41590  | -3.07023 | -1.26360 |  |
| H                                   | 0.33078  | -3.07219 | 0.87720  |  |
| H                                   | -1.52461 | 0.68449  | -0.05167 |  |
| H                                   | -1.43970 | 1.40544  | -2.47292 |  |
| H                                   | -0.00117 | 0.13906  | -4.09827 |  |
| H                                   | 1.31546  | -1.84662 | -3.30464 |  |
| C                                   | 2.29224  | -3.54806 | 1.43789  |  |
| C                                   | 2.54999  | -2.25005 | 2.12302  |  |
| C                                   | 3.32702  | -1.14921 | 1.81175  |  |
| C                                   | 2.94818  | -0.11474 | 2.73357  |  |
| C                                   | 1.95953  | -0.65567 | 3.52822  |  |
| O                                   | 1.70782  | -1.95637 | 3.17314  |  |
| H                                   | 4.07100  | -1.09468 | 1.01680  |  |
| H                                   | 3.34933  | 0.89639  | 2.80239  |  |
| H                                   | 1.37946  | -0.27591 | 4.36688  |  |
| H                                   | 3.19520  | -3.88288 | 0.90075  |  |
| H                                   | 2.00443  | -4.32318 | 2.16691  |  |
| Trans-keto (MP2/cc-pVDZ)            |          |          |          |  |
|                                     |          |          |          |  |

|                                             |          |          |          |  |
|---------------------------------------------|----------|----------|----------|--|
|                                             |          | -1.49605 | 0.38624  |  |
| C                                           | 3.84077  | 0.86658  | 0.84011  |  |
| C                                           | 4.28960  | 0.41096  | -0.37481 |  |
| C                                           | 2.52009  | 0.49944  | 1.37625  |  |
| C                                           | 1.71842  | -0.39227 | 0.48939  |  |
| C                                           | 3.48537  | -0.45759 | -1.20470 |  |
| C                                           | 2.23627  | -0.84212 | -0.78000 |  |
| O                                           | 2.11683  | 0.90908  | 2.47826  |  |
| C                                           | 0.45740  | -0.71682 | 0.96940  |  |
| H                                           | 0.19113  | -0.30541 | 1.95253  |  |
| H                                           | -0.32164 | -1.79015 | -0.57607 |  |
| H                                           | 4.45469  | 1.52279  | 1.46613  |  |
| H                                           | 5.28315  | 0.70989  | -0.72979 |  |
| H                                           | 3.87564  | -0.80342 | -2.16667 |  |
| H                                           | 1.63504  | -1.50677 | -1.41432 |  |
| C                                           | -1.85844 | -1.54455 | 0.85656  |  |
| C                                           | -2.73705 | -0.55270 | 0.16968  |  |
| C                                           | -3.28260 | 0.65895  | 0.54368  |  |
| C                                           | -3.97765 | 1.15712  | -0.60851 |  |
| C                                           | -3.79622 | 0.21445  | -1.59672 |  |
| O                                           | -3.04622 | -0.82965 | -1.13546 |  |
| H                                           | -3.18999 | 1.12711  | 1.52336  |  |
| H                                           | -4.53815 | 2.08645  | -0.70091 |  |
| H                                           | -4.12684 | 0.14069  | -2.63046 |  |
| H                                           | -1.85520 | -1.33977 | 1.93824  |  |
| H                                           | -2.24413 | -2.56669 | 0.70425  |  |
| <b>Geometry of CI-1 point (qualitative)</b> |          |          |          |  |
| N                                           | -0.33203 | -0.89546 | -1.04009 |  |
| C                                           | 3.43044  | 1.08255  | 0.42274  |  |
| C                                           | 4.29319  | -0.00181 | 0.35626  |  |
| C                                           | 1.98486  | 0.93425  | 0.33625  |  |
| C                                           | 1.54025  | -0.46722 | 0.41601  |  |
| C                                           | 3.81219  | -1.33935 | 0.24379  |  |
| C                                           | 2.43871  | -1.55688 | 0.22029  |  |
| O                                           | 1.16486  | 1.87514  | 0.18318  |  |
| C                                           | 0.13943  | -0.57760 | 0.14577  |  |
| H                                           | -0.60313 | -0.11594 | 0.81324  |  |
| H                                           | 0.37009  | -1.18591 | -1.72767 |  |
| H                                           | 3.81514  | 2.10757  | 0.47956  |  |
| H                                           | 5.37546  | 0.17478  | 0.39238  |  |
| H                                           | 4.51110  | -2.17933 | 0.18997  |  |
| H                                           | 2.04115  | -2.58013 | 0.16146  |  |
| C                                           | -1.75414 | -1.00809 | -1.42764 |  |
| C                                           | -2.66051 | -0.38577 | -0.43134 |  |
| C                                           | -3.46798 | -0.90546 | 0.56370  |  |
| C                                           | -4.04347 | 0.22259  | 1.23360  |  |
| C                                           | -3.53779 | 1.33785  | 0.59823  |  |
| O                                           | -2.70134 | 0.97829  | -0.41531 |  |
| H                                           | -3.62098 | -1.96285 | 0.77959  |  |
| H                                           | -4.73727 | 0.21897  | 2.07298  |  |
| H                                           | -3.67309 | 2.40759  | 0.74125  |  |
| H                                           | -2.01189 | -2.07359 | -1.54571 |  |
| H                                           | -1.85147 | -0.51333 | -2.40752 |  |
| <b>Geometry of CI-2 point (qualitative)</b> |          |          |          |  |

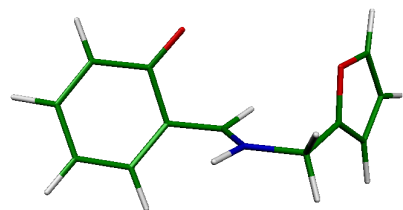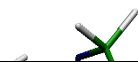

|   |          |          |          |  |
|---|----------|----------|----------|--|
|   |          | -0.74100 | -0.44445 |  |
| C | -0.53798 | 0.50665  | 3.54320  |  |
| C | 0.79029  | 0.44298  | 3.97849  |  |
| C | -0.90845 | -0.04199 | 2.29626  |  |
| C | 0.10684  | -0.61160 | 1.46953  |  |
| C | 1.79028  | -0.14660 | 3.17369  |  |
| C | 1.44351  | -0.68105 | 1.93150  |  |
| O | -2.18754 | 0.00582  | 1.89697  |  |
| C | -0.22012 | -0.99864 | 0.10075  |  |
| H | 0.68037  | -1.06210 | -0.55578 |  |
| H | -2.16192 | -0.34855 | 0.94246  |  |
| H | -1.31901 | 0.96188  | 4.16006  |  |
| H | 1.05486  | 0.86477  | 4.95420  |  |
| H | 2.82680  | -0.18572 | 3.52177  |  |
| H | 2.20282  | -1.13214 | 1.28198  |  |
| C | -1.50063 | 0.25807  | -1.51768 |  |
| C | -0.33720 | 0.34971  | -2.44877 |  |
| C | 0.71240  | 1.24094  | -2.56602 |  |
| C | 1.55800  | 0.73481  | -3.60851 |  |
| C | 0.96499  | -0.43345 | -4.03723 |  |
| O | -0.18189 | -0.67780 | -3.34120 |  |
| H | 0.84808  | 2.14603  | -1.97408 |  |
| H | 2.48017  | 1.16821  | -3.99363 |  |
| H | 1.22202  | -1.16549 | -4.80000 |  |
| H | -1.60971 | 1.22265  | -0.99217 |  |
| H | -2.43136 | 0.06772  | -2.07762 |  |

**Table SM2**

| 1a (0.02eV) |          |          |          |
|-------------|----------|----------|----------|
| N           | 0.23307  | -1.83110 | 1.64421  |
| C           | -1.73371 | -1.19866 | -2.09911 |
| C           | -0.95002 | -0.80684 | -3.19062 |
| C           | -1.14627 | -1.43108 | -0.83817 |
| C           | 0.26198  | -1.26196 | -0.69451 |
| C           | 0.44320  | -0.63730 | -3.05353 |
| C           | 1.03785  | -0.86973 | -1.81049 |
| O           | -1.93935 | -1.81090 | 0.18358  |
| C           | 0.91734  | -1.52761 | 0.58453  |
| H           | 2.02478  | -1.47143 | 0.61077  |
| H           | -1.33818 | -1.86663 | 0.97746  |
| H           | -2.81544 | -1.33430 | -2.19415 |
| H           | -1.42986 | -0.63044 | -4.15927 |
| H           | 1.05157  | -0.33179 | -3.90985 |
| H           | 2.12034  | -0.75040 | -1.68202 |
| C           | 0.96580  | -2.15827 | 2.85842  |
| C           | 0.62310  | -3.56604 | 3.24219  |
| C           | -0.21042 | -4.50890 | 2.67837  |
| C           | -0.11982 | -5.66843 | 3.52219  |
| C           | 0.75923  | -5.33799 | 4.52921  |
| O           | 1.21674  | -4.05886 | 4.36888  |
| H           | -0.80974 | -4.36832 | 1.78008  |
| H           | -0.63406 | -6.62144 | 3.40438  |
| H           | 1.14786  | -5.87399 | 5.39223  |
| H           | 0.65143  | -1.46536 | 3.66021  |
| H           | 2.06199  | -2.04673 | 2.72501  |
| 1b (0.6 eV) |          |          |          |
| N           | 0.98729  | -3.08653 | 0.80463  |
| C           | -1.50854 | -1.51795 | -2.46656 |
| C           | -1.14353 | -0.26187 | -2.97350 |
| C           | -0.83544 | -2.08642 | -1.36805 |
| C           | 0.23577  | -1.37440 | -0.76515 |
| C           | -0.09350 | 0.45569  | -2.37825 |
| C           | 0.57534  | -0.10425 | -1.28215 |
| O           | -1.19884 | -3.29709 | -0.85844 |
| C           | 1.00835  | -1.86574 | 0.39121  |
| H           | 1.63791  | -1.09355 | 0.88708  |
| H           | -2.33563 | -2.07297 | -2.92742 |
| H           | -1.68571 | 0.15230  | -3.82976 |
| H           | 0.19649  | 1.43868  | -2.76079 |
| H           | 1.39368  | 0.44570  | -0.80285 |
| C           | 1.78664  | -3.36372 | 1.99091  |
| C           | 0.86296  | -3.88145 | 3.05147  |
| C           | -0.48222 | -4.18274 | 3.04038  |
| C           | -0.79185 | -4.64960 | 4.36380  |
| C           | 0.38853  | -4.59698 | 5.07176  |
| O           | 1.40318  | -4.13073 | 4.28204  |
| H           | -1.13623 | -4.07649 | 2.17647  |
| H           | -1.75570 | -4.98178 | 4.74821  |
| H           | 0.66054  | -4.84038 | 6.09651  |
| H           | 2.33981  | -2.47415 | 2.36551  |
| 2a (0.5 eV) |          |          |          |

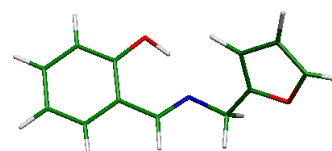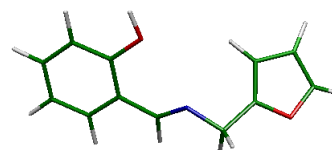

|                     |          |          |          |                                                                                       |
|---------------------|----------|----------|----------|---------------------------------------------------------------------------------------|
| N                   | 2.61750  | -2.39581 | -0.17983 | 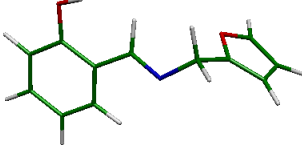   |
| C                   | -1.55433 | -0.59515 | -1.90800 |                                                                                       |
| C                   | -0.95764 | -0.30528 | -3.14039 |                                                                                       |
| C                   | -0.79683 | -1.16175 | -0.86627 |                                                                                       |
| C                   | 0.58164  | -1.42615 | -1.05883 |                                                                                       |
| C                   | 0.40834  | -0.58340 | -3.34996 |                                                                                       |
| C                   | 1.16551  | -1.13734 | -2.31470 |                                                                                       |
| O                   | -1.47104 | -1.41989 | 0.29992  |                                                                                       |
| C                   | 1.41849  | -1.96440 | 0.02895  |                                                                                       |
| H                   | 0.99567  | -1.96195 | 1.05835  |                                                                                       |
| H                   | -2.61555 | -0.39981 | -1.72655 |                                                                                       |
| H                   | -1.56156 | 0.13420  | -3.94117 |                                                                                       |
| H                   | 0.87600  | -0.35968 | -4.31369 |                                                                                       |
| H                   | 2.23085  | -1.35484 | -2.43577 |                                                                                       |
| C                   | 3.35134  | -2.81732 | 1.01628  |                                                                                       |
| C                   | 4.40097  | -1.80982 | 1.34849  |                                                                                       |
| C                   | 5.77936  | -1.80330 | 1.27390  |                                                                                       |
| C                   | 6.20109  | -0.50712 | 1.72188  |                                                                                       |
| C                   | 5.04517  | 0.17697  | 2.03129  |                                                                                       |
| O                   | 3.94880  | -0.60352 | 1.81068  |                                                                                       |
| H                   | 6.40292  | -2.63003 | 0.93515  |                                                                                       |
| H                   | 7.21762  | -0.12457 | 1.80498  |                                                                                       |
| H                   | 4.84663  | 1.17931  | 2.40474  |                                                                                       |
| H                   | 3.85049  | -3.77684 | 0.80435  |                                                                                       |
| <b>2b (0.43 eV)</b> |          |          |          |  |
| N                   | 2.53938  | -1.79258 | 0.23434  |                                                                                       |
| C                   | -1.57332 | -0.74820 | -2.12029 |                                                                                       |
| C                   | -0.87525 | -0.52371 | -3.31641 |                                                                                       |
| C                   | -0.87982 | -1.10489 | -0.95004 |                                                                                       |
| C                   | 0.52858  | -1.23813 | -0.97395 |                                                                                       |
| C                   | 0.52519  | -0.65448 | -3.35016 |                                                                                       |
| C                   | 1.21522  | -1.00857 | -2.18458 |                                                                                       |
| O                   | -1.52066 | -1.33656 | 0.24060  |                                                                                       |
| C                   | 1.26076  | -1.60913 | 0.25357  |                                                                                       |
| H                   | 0.66188  | -1.72125 | 1.17671  |                                                                                       |
| H                   | -2.66558 | -0.64744 | -2.09235 |                                                                                       |
| H                   | -1.42892 | -0.24622 | -4.21938 |                                                                                       |
| H                   | 1.07214  | -0.47842 | -4.28152 |                                                                                       |
| H                   | 2.30389  | -1.11668 | -2.17270 |                                                                                       |
| C                   | 3.14194  | -2.11175 | 1.53159  |                                                                                       |
| C                   | 3.97337  | -0.96530 | 2.00305  |                                                                                       |
| C                   | 5.33218  | -0.76163 | 2.13691  |                                                                                       |
| C                   | 5.49388  | 0.57726  | 2.62686  |                                                                                       |
| C                   | 4.21901  | 1.08670  | 2.75028  |                                                                                       |
| O                   | 3.29075  | 0.16056  | 2.37717  |                                                                                       |
| H                   | 6.11045  | -1.48840 | 1.90630  |                                                                                       |
| H                   | 6.42153  | 1.09987  | 2.85711  |                                                                                       |
| H                   | 3.82625  | 2.04723  | 3.07703  |                                                                                       |
| H                   | 3.80496  | -2.98391 | 1.40696  |                                                                                       |
| H                   | 2.37465  | -2.35879 | 2.29550  |                                                                                       |
| H                   | -2.46625 | -1.19189 | 0.09053  |                                                                                       |
| <b>3a (0.69 eV)</b> |          |          |          |                                                                                       |

|                     |          |          |          |                                                                                       |
|---------------------|----------|----------|----------|---------------------------------------------------------------------------------------|
| N                   | 2.83960  | -1.58988 | -0.22555 | 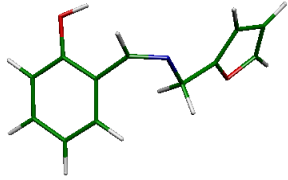   |
| C                   | -1.75140 | -0.70291 | -1.62890 |                                                                                       |
| C                   | -1.47465 | -0.23925 | -2.92231 |                                                                                       |
| C                   | -0.72110 | -1.23968 | -0.83814 |                                                                                       |
| C                   | 0.59937  | -1.31273 | -1.34203 |                                                                                       |
| C                   | -0.16624 | -0.30263 | -3.43661 |                                                                                       |
| C                   | 0.86022  | -0.83816 | -2.64697 |                                                                                       |
| O                   | -1.05733 | -1.67610 | 0.41531  |                                                                                       |
| C                   | 1.64493  | -1.98511 | -0.52342 |                                                                                       |
| H                   | 1.36677  | -2.97539 | -0.11776 |                                                                                       |
| H                   | -2.76019 | -0.65535 | -1.20777 |                                                                                       |
| H                   | -2.28471 | 0.17864  | -3.52895 |                                                                                       |
| H                   | 0.04924  | 0.05375  | -4.44841 |                                                                                       |
| H                   | 1.87501  | -0.92639 | -3.04912 |                                                                                       |
| C                   | 3.26625  | -0.26650 | -0.67797 |                                                                                       |
| C                   | 4.09060  | 0.34668  | 0.41157  |                                                                                       |
| C                   | 4.63405  | -0.15178 | 1.57639  |                                                                                       |
| C                   | 5.33461  | 0.94420  | 2.18693  |                                                                                       |
| C                   | 5.16423  | 2.02032  | 1.34459  |                                                                                       |
| O                   | 4.40824  | 1.66765  | 0.26135  |                                                                                       |
| H                   | 4.53149  | -1.17603 | 1.92828  |                                                                                       |
| H                   | 5.89103  | 0.94346  | 3.12361  |                                                                                       |
| H                   | 5.49592  | 3.05587  | 1.37308  |                                                                                       |
| H                   | 2.42907  | 0.40750  | -0.94607 |                                                                                       |
| H                   | 3.88710  | -0.39371 | -1.58618 |                                                                                       |
| H                   | -0.23651 | -1.82447 | 0.90853  |                                                                                       |
| <b>3b (0.68 eV)</b> |          |          |          |  |
| N                   | 2.83211  | -1.57457 | -0.23425 |                                                                                       |
| C                   | -1.76829 | -0.83323 | -1.70495 |                                                                                       |
| C                   | -1.47271 | -0.25081 | -2.94803 |                                                                                       |
| C                   | -0.74141 | -1.38775 | -0.92249 |                                                                                       |
| C                   | 0.60068  | -1.34854 | -1.37101 |                                                                                       |
| C                   | -0.14892 | -0.22211 | -3.41589 |                                                                                       |
| C                   | 0.87530  | -0.77003 | -2.62768 |                                                                                       |
| O                   | -0.96762 | -1.97280 | 0.29408  |                                                                                       |
| C                   | 1.64909  | -1.99762 | -0.53683 |                                                                                       |
| H                   | 1.37176  | -2.97578 | -0.11360 |                                                                                       |
| H                   | -2.80257 | -0.85842 | -1.33988 |                                                                                       |
| H                   | -2.28196 | 0.17619  | -3.54918 |                                                                                       |
| H                   | 0.08398  | 0.21739  | -4.39042 |                                                                                       |
| H                   | 1.90420  | -0.78031 | -3.00095 |                                                                                       |
| C                   | 3.24522  | -0.24419 | -0.67594 |                                                                                       |
| C                   | 4.08662  | 0.35708  | 0.40737  |                                                                                       |
| C                   | 4.61368  | -0.14426 | 1.57807  |                                                                                       |
| C                   | 5.34527  | 0.93726  | 2.17818  |                                                                                       |
| C                   | 5.20753  | 2.00910  | 1.32439  |                                                                                       |
| O                   | 4.44258  | 1.66744  | 0.24390  |                                                                                       |
| H                   | 4.47761  | -1.16106 | 1.93966  |                                                                                       |
| H                   | 5.90038  | 0.93034  | 3.11568  |                                                                                       |
| H                   | 5.57018  | 3.03452  | 1.34239  |                                                                                       |
| H                   | 2.40158  | 0.43236  | -0.91700 |                                                                                       |
| H                   | 3.85330  | -0.34804 | -1.59600 |                                                                                       |
| H                   | -1.92391 | -1.96305 | 0.44880  |                                                                                       |
| <b>4a (0.55eV)</b>  |          |          |          |                                                                                       |

|                     |          |          |          |                                                                                       |
|---------------------|----------|----------|----------|---------------------------------------------------------------------------------------|
| N                   | 3.35084  | -1.76373 | -1.04946 | 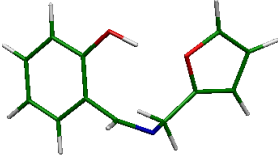   |
| C                   | -1.15759 | -0.27520 | -0.90319 |                                                                                       |
| C                   | -1.48241 | -0.04894 | -2.24857 |                                                                                       |
| C                   | 0.04350  | -0.92125 | -0.55890 |                                                                                       |
| C                   | 0.92234  | -1.35640 | -1.57874 |                                                                                       |
| C                   | -0.60374 | -0.45707 | -3.26785 |                                                                                       |
| C                   | 0.58930  | -1.11304 | -2.92790 |                                                                                       |
| O                   | 0.29375  | -1.13962 | 0.76908  |                                                                                       |
| C                   | 2.13566  | -2.16629 | -1.23274 |                                                                                       |
| H                   | 1.97495  | -3.25323 | -1.12570 |                                                                                       |
| H                   | -1.82053 | 0.04625  | -0.09390 |                                                                                       |
| H                   | -2.42023 | 0.45746  | -2.49973 |                                                                                       |
| H                   | -0.84987 | -0.27520 | -4.31860 |                                                                                       |
| H                   | 1.27291  | -1.45801 | -3.71217 |                                                                                       |
| C                   | 3.58590  | -0.31516 | -1.12706 |                                                                                       |
| C                   | 3.88728  | 0.19544  | 0.24299  |                                                                                       |
| C                   | 4.96276  | 0.83066  | 0.82531  |                                                                                       |
| C                   | 4.60146  | 1.07867  | 2.19352  |                                                                                       |
| C                   | 3.33173  | 0.57206  | 2.34969  |                                                                                       |
| O                   | 2.88692  | 0.03484  | 1.17155  |                                                                                       |
| H                   | 5.89644  | 1.08537  | 0.32522  |                                                                                       |
| H                   | 5.19804  | 1.56357  | 2.96516  |                                                                                       |
| H                   | 2.64021  | 0.51510  | 3.18756  |                                                                                       |
| H                   | 2.73087  | 0.23990  | -1.56084 |                                                                                       |
| H                   | 4.47445  | -0.14176 | -1.75544 |                                                                                       |
| H                   | 1.25727  | -1.08982 | 0.89601  |                                                                                       |
| <b>4b (0.71 eV)</b> |          |          |          |                                                                                       |
| N                   | -4.75044 | -1.19697 | -2.68171 |  |
| C                   | -0.00484 | -1.92845 | -1.81045 |                                                                                       |
| C                   | 0.50251  | -0.89318 | -2.61240 |                                                                                       |
| C                   | -1.38828 | -2.03802 | -1.58962 |                                                                                       |
| C                   | -2.28286 | -1.11868 | -2.18663 |                                                                                       |
| C                   | -0.37087 | 0.03929  | -3.19527 |                                                                                       |
| C                   | -1.75296 | -0.07818 | -2.97729 |                                                                                       |
| O                   | -1.94277 | -3.01967 | -0.81369 |                                                                                       |
| C                   | -3.73729 | -1.23130 | -1.87944 |                                                                                       |
| H                   | -3.98050 | -1.36041 | -0.81248 |                                                                                       |
| H                   | 0.67725  | -2.65525 | -1.35189 |                                                                                       |
| H                   | 1.58250  | -0.81750 | -2.77524 |                                                                                       |
| H                   | 0.02109  | 0.85607  | -3.80885 |                                                                                       |
| H                   | -2.43917 | 0.66186  | -3.40262 |                                                                                       |
| C                   | -4.50289 | -1.14141 | -4.12900 |                                                                                       |
| C                   | -5.36153 | -2.15082 | -4.81479 |                                                                                       |
| C                   | -6.48999 | -2.06590 | -5.60534 |                                                                                       |
| C                   | -6.84610 | -3.41292 | -5.94832 |                                                                                       |
| C                   | -5.90584 | -4.21475 | -5.33768 |                                                                                       |
| O                   | -5.00086 | -3.46091 | -4.65142 |                                                                                       |
| H                   | -6.99692 | -1.14582 | -5.89440 |                                                                                       |
| H                   | -7.68138 | -3.75106 | -6.56043 |                                                                                       |
| H                   | -5.75234 | -5.29115 | -5.30063 |                                                                                       |
| H                   | -3.44370 | -1.31038 | -4.40133 |                                                                                       |
| H                   | -4.79947 | -0.14312 | -4.49632 |                                                                                       |
| H                   | -1.21684 | -3.54658 | -0.44778 |                                                                                       |
| <b>5a (0.00 eV)</b> |          |          |          |                                                                                       |



|                     |          |          |          |
|---------------------|----------|----------|----------|
| N                   | -0.31691 | 1.36366  | -0.05114 |
| C                   | 3.84087  | 0.33357  | 0.05321  |
| C                   | 4.17536  | -1.02519 | 0.01372  |
| C                   | 2.49178  | 0.74410  | 0.02318  |
| C                   | 1.47179  | -0.24852 | -0.04721 |
| C                   | 3.17054  | -2.01173 | -0.05634 |
| C                   | 1.83015  | -1.61623 | -0.08632 |
| O                   | 2.21628  | 2.06208  | 0.06262  |
| C                   | 0.05607  | 0.12160  | -0.08261 |
| H                   | -0.67396 | -0.70757 | -0.13997 |
| H                   | 1.22187  | 2.12208  | 0.03295  |
| H                   | 4.61192  | 1.10828  | 0.10788  |
| H                   | 5.23034  | -1.31880 | 0.03805  |
| H                   | 3.43587  | -3.07266 | -0.08698 |
| H                   | 1.03098  | -2.36533 | -0.14050 |
| C                   | -1.75444 | 1.68685  | -0.09389 |
| C                   | -2.69568 | 0.53232  | -0.12958 |
| C                   | -3.34826 | -0.12846 | -1.15375 |
| C                   | -4.04586 | -1.22586 | -0.54930 |
| C                   | -3.75941 | -1.15585 | 0.79766  |
| O                   | -2.94179 | -0.09751 | 1.06293  |
| H                   | -3.32556 | 0.15069  | -2.20708 |
| H                   | -4.67882 | -1.96728 | -1.03535 |
| H                   | -4.05811 | -1.75211 | 1.65736  |
| H                   | -1.92224 | 2.31536  | -0.98523 |
| H                   | -1.96637 | 2.31728  | 0.78689  |
| <b>5b (0.60 eV)</b> |          |          |          |
| N                   | -3.64278 | -2.05960 | -2.53670 |
| C                   | 0.30365  | -1.56741 | -0.62450 |
| C                   | 1.28034  | -0.89885 | -1.37749 |
| C                   | -0.99150 | -1.78641 | -1.13292 |
| C                   | -1.31574 | -1.32132 | -2.43580 |
| C                   | 0.97198  | -0.43430 | -2.66600 |
| C                   | -0.31501 | -0.65086 | -3.17510 |
| O                   | -1.94095 | -2.43500 | -0.40398 |
| C                   | -2.62970 | -1.48320 | -3.08819 |
| H                   | -2.67338 | -1.05427 | -4.11010 |
| H                   | -1.52447 | -2.67087 | 0.43948  |
| H                   | 0.54537  | -1.93050 | 0.38277  |
| H                   | 2.27775  | -0.74478 | -0.95290 |
| H                   | 1.72367  | 0.08859  | -3.26469 |
| H                   | -0.57163 | -0.29495 | -4.17984 |
| C                   | -4.88749 | -2.13434 | -3.32436 |
| C                   | -4.87743 | -1.56465 | -4.70389 |
| C                   | -5.23833 | -0.33622 | -5.22623 |
| C                   | -4.89485 | -0.36711 | -6.61845 |
| C                   | -4.34171 | -1.61057 | -6.83954 |
| O                   | -4.32344 | -2.34198 | -5.68928 |
| H                   | -5.69696 | 0.48044  | -4.66888 |
| H                   | -5.03798 | 0.41560  | -7.36261 |
| H                   | -3.94423 | -2.10495 | -7.72361 |
| H                   | -5.67108 | -1.62570 | -2.73600 |
| H                   | -5.17009 | -3.20098 | -3.36588 |
| <b>6a (0.48eV)</b>  |          |          |          |

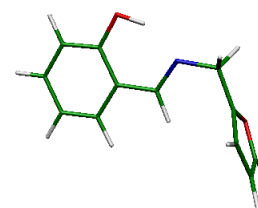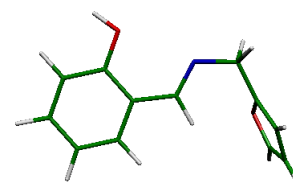

|                    |          |          |          |
|--------------------|----------|----------|----------|
| N                  | 1.98284  | -0.86379 | 0.82911  |
| C                  | -1.26370 | -1.75270 | -2.67411 |
| C                  | -0.86033 | -0.61584 | -3.38358 |
| C                  | -0.66070 | -2.07600 | -1.44405 |
| C                  | 0.35141  | -1.23848 | -0.91231 |
| C                  | 0.15847  | 0.21406  | -2.87313 |
| C                  | 0.75376  | -0.09993 | -1.64872 |
| O                  | -1.11752 | -3.21320 | -0.82953 |
| C                  | 0.96445  | -1.52801 | 0.39728  |
| H                  | 0.49905  | -2.32233 | 1.01551  |
| H                  | -0.53104 | -3.41301 | -0.08638 |
| H                  | -2.04435 | -2.41761 | -3.05597 |
| H                  | -1.33879 | -0.37955 | -4.33984 |
| H                  | 0.47800  | 1.10137  | -3.42830 |
| H                  | 1.54162  | 0.52466  | -1.21730 |
| C                  | 2.50928  | -1.20559 | 2.16337  |
| C                  | 1.86501  | -2.34777 | 2.87463  |
| C                  | 0.85244  | -2.43482 | 3.81251  |
| C                  | 0.59204  | -3.83237 | 4.00351  |
| C                  | 1.45987  | -4.49399 | 3.16043  |
| O                  | 2.23220  | -3.60651 | 2.47042  |
| H                  | 0.36392  | -1.59135 | 4.30025  |
| H                  | -0.13130 | -4.29414 | 4.67464  |
| H                  | 1.65259  | -5.54653 | 2.96245  |
| H                  | 2.42598  | -0.29971 | 2.78875  |
| H                  | 3.58780  | -1.40364 | 2.03678  |
| <b>6b (0.43eV)</b> |          |          |          |
| N                  | -2.71839 | -1.25288 | -4.41326 |
| C                  | 0.03944  | -1.05664 | -0.43315 |
| C                  | 0.95375  | -0.19987 | -1.06433 |
| C                  | -1.09472 | -1.51857 | -1.12484 |
| C                  | -1.32003 | -1.12077 | -2.46402 |
| C                  | 0.73868  | 0.20148  | -2.39543 |
| C                  | -0.39079 | -0.25908 | -3.08305 |
| O                  | -2.01403 | -2.35697 | -0.54718 |
| C                  | -2.51268 | -1.60755 | -3.18933 |
| H                  | -3.19000 | -2.27569 | -2.63136 |
| H                  | -1.71627 | -2.52899 | 0.35797  |
| H                  | 0.20497  | -1.37102 | 0.60504  |
| H                  | 1.83204  | 0.15175  | -0.51304 |
| H                  | 1.44985  | 0.86998  | -2.89045 |
| H                  | -0.59015 | 0.03269  | -4.11847 |
| C                  | -3.92198 | -1.77201 | -5.08554 |
| C                  | -4.82712 | -2.66000 | -4.29913 |
| C                  | -4.95048 | -4.03286 | -4.19207 |
| C                  | -5.95260 | -4.27581 | -3.19532 |
| C                  | -6.35954 | -3.03157 | -2.76303 |
| O                  | -5.68492 | -2.04716 | -3.42208 |
| H                  | -4.38653 | -4.76785 | -4.76617 |
| H                  | -6.32912 | -5.23519 | -2.84235 |
| H                  | -7.09396 | -2.69740 | -2.03312 |
| H                  | -3.58140 | -2.31777 | -5.98280 |
| H                  | -4.48550 | -0.89426 | -5.44838 |
| <b>7a(0.61 eV)</b> |          |          |          |

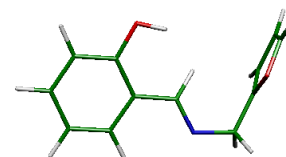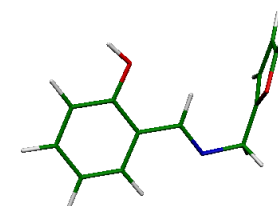

|                    |          |          |          |
|--------------------|----------|----------|----------|
| N                  | 3.57516  | -1.66829 | 1.26569  |
| C                  | 6.67255  | -4.25097 | -1.29333 |
| C                  | 7.61886  | -4.58855 | -0.31366 |
| C                  | 5.68029  | -3.29561 | -1.01670 |
| C                  | 5.63250  | -2.67231 | 0.25104  |
| C                  | 7.57019  | -3.98548 | 0.95595  |
| C                  | 6.58037  | -3.02995 | 1.23186  |
| O                  | 4.79037  | -2.98074 | -2.01169 |
| C                  | 4.62952  | -1.59711 | 0.52026  |
| H                  | 4.80868  | -0.62171 | 0.03603  |
| H                  | 3.94002  | -2.81015 | -1.57273 |
| H                  | 6.68141  | -4.71661 | -2.28377 |
| H                  | 8.38996  | -5.33234 | -0.54061 |
| H                  | 8.30545  | -4.24975 | 1.72249  |
| H                  | 6.54760  | -2.53473 | 2.20922  |
| C                  | 3.29733  | -2.98912 | 1.88302  |
| C                  | 3.22756  | -4.09876 | 0.87961  |
| C                  | 2.46395  | -4.27174 | -0.26430 |
| C                  | 2.89660  | -5.50418 | -0.85537 |
| C                  | 3.88346  | -5.99169 | -0.02373 |
| O                  | 4.08050  | -5.15448 | 1.03296  |
| H                  | 1.67831  | -3.59939 | -0.61206 |
| H                  | 2.53618  | -5.97144 | -1.77099 |
| H                  | 4.50422  | -6.88472 | -0.04281 |
| H                  | 2.33642  | -2.89111 | 2.41259  |
| H                  | 4.06523  | -3.24528 | 2.63341  |
| <b>7b(0.66eV)</b>  |          |          |          |
| N                  | 9.20351  | -4.42886 | -3.20436 |
| C                  | 6.41813  | -2.03606 | -0.22058 |
| C                  | 6.86337  | -2.54388 | 1.01134  |
| C                  | 6.77381  | -2.67744 | -1.41968 |
| C                  | 7.60995  | -3.81467 | -1.39193 |
| C                  | 7.67111  | -3.69189 | 1.05106  |
| C                  | 8.03808  | -4.32096 | -0.14967 |
| O                  | 6.35386  | -2.25261 | -2.65039 |
| C                  | 8.02771  | -4.46436 | -2.67065 |
| H                  | 7.26376  | -5.03953 | -3.21931 |
| H                  | 5.96036  | -1.37483 | -2.53363 |
| H                  | 5.77902  | -1.14490 | -0.25293 |
| H                  | 6.57348  | -2.03876 | 1.93866  |
| H                  | 8.01112  | -4.09587 | 2.00966  |
| H                  | 8.66968  | -5.21655 | -0.13296 |
| C                  | 10.22420 | -3.61209 | -2.50403 |
| C                  | 9.78838  | -2.20265 | -2.23931 |
| C                  | 9.28771  | -1.21155 | -3.06370 |
| C                  | 9.00757  | -0.08872 | -2.21950 |
| C                  | 9.36586  | -0.47770 | -0.94375 |
| O                  | 9.84896  | -1.75038 | -0.94806 |
| H                  | 9.11995  | -1.30483 | -4.13598 |
| H                  | 8.60793  | 0.88388  | -2.50694 |
| H                  | 9.35314  | 0.02174  | 0.02278  |
| H                  | 11.12009 | -3.61903 | -3.14562 |
| H                  | 10.50886 | -4.07321 | -1.54201 |
| <b>8a(.060 eV)</b> |          |          |          |

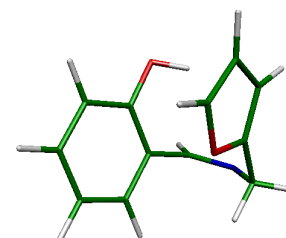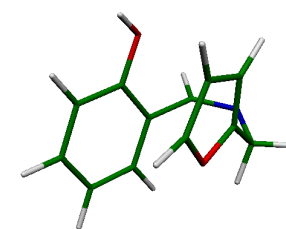

|                    |          |          |          |
|--------------------|----------|----------|----------|
| N                  | 3.84564  | -1.75379 | 1.55272  |
| C                  | 6.52410  | -3.34607 | -1.77224 |
| C                  | 7.11264  | -4.55027 | -1.36194 |
| C                  | 5.87206  | -2.52659 | -0.83607 |
| C                  | 5.81120  | -2.91216 | 0.52264  |
| C                  | 7.06989  | -4.93867 | -0.00977 |
| C                  | 6.43625  | -4.11021 | 0.92684  |
| O                  | 5.30571  | -1.36734 | -1.30156 |
| C                  | 5.10673  | -2.04748 | 1.51299  |
| H                  | 5.72516  | -1.59162 | 2.30599  |
| H                  | 5.02118  | -0.85606 | -0.52605 |
| H                  | 6.55806  | -3.01926 | -2.81609 |
| H                  | 7.61429  | -5.18374 | -2.10119 |
| H                  | 7.53212  | -5.87691 | 0.31236  |
| H                  | 6.39138  | -4.40046 | 1.98246  |
| C                  | 2.95550  | -2.41917 | 0.56742  |
| C                  | 3.09242  | -3.90979 | 0.54622  |
| C                  | 2.90762  | -4.87881 | 1.51616  |
| C                  | 3.27804  | -6.12572 | 0.91613  |
| C                  | 3.65430  | -5.82360 | -0.37694 |
| O                  | 3.53697  | -4.48760 | -0.61122 |
| H                  | 2.55995  | -4.70063 | 2.53366  |
| H                  | 3.26746  | -7.11697 | 1.36834  |
| H                  | 4.00217  | -6.42248 | -1.21581 |
| H                  | 3.13455  | -2.03566 | -0.45293 |
| H                  | 1.92829  | -2.13974 | 0.84979  |
| <b>8b(0.67 eV)</b> |          |          |          |
| N                  | 9.17433  | -4.53126 | -3.16716 |
| C                  | 6.43861  | -2.15524 | -0.11829 |
| C                  | 7.14193  | -2.38866 | 1.07524  |
| C                  | 6.72709  | -2.91118 | -1.26609 |
| C                  | 7.74230  | -3.89156 | -1.23017 |
| C                  | 8.12804  | -3.38765 | 1.13157  |
| C                  | 8.41845  | -4.13700 | -0.02042 |
| O                  | 6.08510  | -2.73751 | -2.46210 |
| C                  | 8.09272  | -4.64471 | -2.47116 |
| H                  | 7.36046  | -5.38420 | -2.83529 |
| H                  | 5.49240  | -1.97728 | -2.36402 |
| H                  | 5.66235  | -1.38095 | -0.15894 |
| H                  | 6.90873  | -1.79158 | 1.96306  |
| H                  | 8.66228  | -3.58463 | 2.06644  |
| H                  | 9.18563  | -4.91947 | 0.00717  |
| C                  | 10.15616 | -3.50522 | -2.74597 |
| C                  | 9.58731  | -2.14819 | -2.47311 |
| C                  | 9.68954  | -1.26427 | -1.41462 |
| C                  | 8.90870  | -0.11689 | -1.77097 |
| C                  | 8.39328  | -0.38740 | -3.02229 |
| O                  | 8.80860  | -1.60865 | -3.46036 |
| H                  | 10.22948 | -1.44311 | -0.48556 |
| H                  | 8.74360  | 0.78795  | -1.18658 |
| H                  | 7.75607  | 0.16974  | -3.70623 |
| H                  | 10.89786 | -3.44146 | -3.55976 |
| H                  | 10.69841 | -3.83591 | -1.84209 |

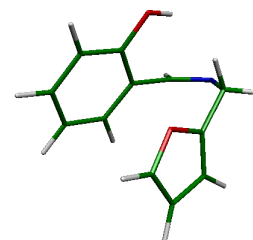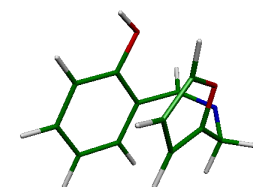

**Table SM3:**

|  |  |    |    |
|--|--|----|----|
|  |  | S0 | S1 |
|--|--|----|----|

|                     |                     |          |                 |
|---------------------|---------------------|----------|-----------------|
| <b>Part (1)</b>     | C2                  | -0.30793 | -0.27539        |
|                     | C3                  | -0.14929 | -0.28593        |
|                     | C4                  | 0.48685  | 0.52334         |
|                     | C5                  | -0.24719 | -0.14233        |
|                     | C6                  | -0.28799 | -0.09379        |
|                     | C7                  | -0.14047 | -0.28575        |
|                     | O8                  | -0.79326 | -0.74233        |
|                     | C9                  | 0.23068  | 0.12184         |
|                     | H10                 | 0.18872  | 0.1893          |
|                     | H11                 | 0.54422  | 0.54771         |
|                     | H12                 | 0.23326  | 0.23467         |
|                     | H13                 | 0.22132  | 0.22088         |
|                     | H14                 | 0.22175  | 0.22021         |
|                     | H15                 | 0.21849  | 0.22339         |
|                     | Sum                 | 0.41916  | 0.45582         |
| Transferred Charged |                     |          | <b>+0.03666</b> |
| <b>Part (2)</b>     | N1                  | -0.63532 | -0.66045        |
|                     | C16                 | -0.20253 | -0.20301        |
|                     | C17                 | 0.3306   | 0.33666         |
|                     | C18                 | -0.30941 | -0.31223        |
|                     | C19                 | -0.3294  | -0.32884        |
|                     | C20                 | 0.18936  | 0.18739         |
|                     | O21                 | -0.58603 | -0.58639        |
|                     | H22                 | 0.23567  | 0.23453         |
|                     | H23                 | 0.2344   | 0.23288         |
|                     | H24                 | 0.20746  | 0.20602         |
|                     | H25                 | 0.22016  | 0.21549         |
|                     | H26                 | 0.22587  | 0.22214         |
|                     | Sum                 | -0.41917 | -0.45581        |
|                     | Transferred Charged |          |                 |

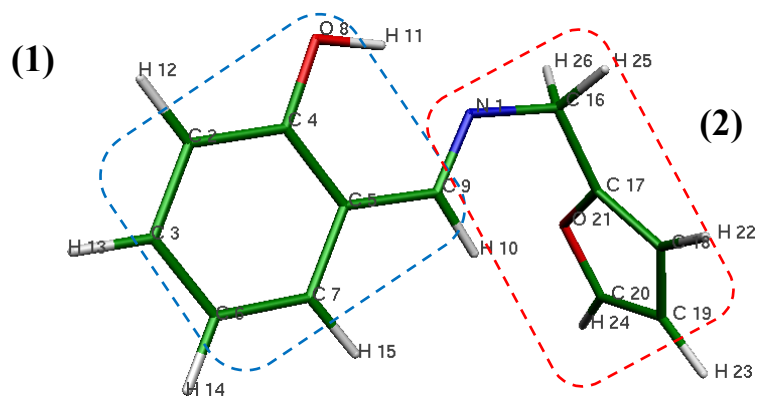

**Table SM4:**

| <b>S<sub>0</sub>-enol (5a)</b> |         | <b>S<sub>1</sub>-keto</b> |
|--------------------------------|---------|---------------------------|
| <b>Distance</b>                |         |                           |
| H1-O1                          | 0.997   | 1.861                     |
| O1-C1                          | 1.357   | 1.418                     |
| C1-C6                          | 1.410   | 1.378                     |
| C6-C5                          | 1.403   | 1.439                     |
| C5-C4                          | 1.412   | 1.386                     |
| C4-C3                          | 1.400   | 1.424                     |
| C3-C2                          | 1.416   | 1.409                     |
| C2-C7                          | 1.464   | 1.438                     |
| C7-N1                          | 1.300   | 1.387                     |
| N1-C8                          | 1.479   | 1.483                     |
| C8-C9                          | 1.490   | 1.490                     |
| C9-O2                          | 1.378   | 1.378                     |
| O2-C12                         | 1.371   | 1.372                     |
| C12-C11                        | 1.381   | 1.379                     |
| C11-C10                        | 1.436   | 1.436                     |
| <b>Angle</b>                   |         |                           |
| H1-O1-C1                       | 106.116 | 99.173                    |
| O1-C1-C6                       | 118.569 | 119.270                   |
| C1-C6-C5                       | 120.291 | 119.525                   |
| C2-C3-C 6                      | 120.727 | 120.027                   |
| C5-C4-C3                       | 119.225 | 119.788                   |
| C4-C3-C2                       | 120.934 | 121.420                   |
| C2-C1-C6                       | 119.433 | 121.851                   |
| C1-C2-C7                       | 121.521 | 119.722                   |
| C2-C7-N1                       | 121.585 | 122.198                   |
| C7-N1-C8                       | 118.864 | 117.022                   |
| N1-C8-C9                       | 115.806 | 110.832                   |
| C8-C9-C10                      | 133.693 | 133.398                   |
| C8-C9-O2                       | 116.452 | 115.491                   |
| C9-O2-C12                      | 107.316 | 106.695                   |
| C12-C11-C10                    | 106.048 | 106.046                   |
| <b>Dihedral</b>                |         |                           |
| H1-O1-C1-C2                    | 0.164   | -25.690                   |
| C1-C2-C7-N1                    | -1.00   | 22.996                    |
| C2-C7-N1-C8                    | 179.683 | -129.167                  |
| N1-C8-C9-C10                   | -94.765 | -85.204                   |
